# Supplementary material
Source: publisher figshare collection journal article supplement (https://springernature.figshare.com/ndownloader/files/12998396)
Supplement: Supplementary file 1 [file 12998396]

## Sheet: All
BAIT Gene symbol	PREY Gene Symbol	INTERACTION		Interaction in BioGRID
		Without TNF	With TNF
TNFAIP3	TNFAIP3	strong	strong	yes
TNFAIP3	TNIP1	strong	strong	yes
TNFAIP3	TNIP2	strong	strong	yes
TNFAIP3	TAX1BP1	strong	strong	yes
TNFAIP3	TBK1	strong	strong	yes
TNFAIP3	AZI2	strong
TNFAIP3	TRAF2	strong	strong	yes
TNFAIP3	ART4	strong
TNFAIP3	PLEKHB2	strong	strong
TNFAIP3	KIF5C	strong
TNFAIP3	C3orf58	weak
TNFAIP3	G3BP1	weak
TNFAIP3	PCSK5	weak
TNFAIP3	STAT1	weak
TNFAIP3	CALCOCO2	weak
TNFAIP3	HABP2	weak
TNFAIP3	MYH11	weak
TNFAIP3	PREP	weak
TNFAIP3	TTR	weak
TNFAIP3	RCC2	weak
TNFAIP3	TNF		strong	yes
TNFAIP3	TNFRSF1A		strong	yes
TNFAIP3	TRADD		strong
TNFAIP3	RIPK1		strong	yes
TNFAIP3	FZD7		strong
TNFAIP3	SLC26A2		strong
TNFAIP3	OPTN		weak
TNFAIP3	S1PR2		weak
TNFAIP3	AFM		weak
TNFAIP3	GALNT1		weak
TNFAIP3	LRRC69		weak
TNFAIP3	SDK2		weak
TNFAIP3	SEPSECS		weak
TRADD	TRADD	strong	strong	yes
TRADD	ULK3	strong	strong
TRADD	TRAF2	strong	strong	yes
TRADD	UEVLD	strong
TRADD	FADD	strong	strong	yes
TRADD	PCSK5	strong
TRADD	RIPK1	strong	strong	yes
TRADD	IKBKG	strong
TRADD	TRAF3	strong
TRADD	CCAR2	strong
TRADD	CASP8	strong	strong	yes
TRADD	NOL6	strong
TRADD	FAM188A	strong
TRADD	TNFAIP3	strong
TRADD	TNIP1	strong
TRADD	RNF115	strong
TRADD	PRPF4	strong
TRADD	PCOLCE2	strong
TRADD	POLR1A	strong
TRADD	RRP9	strong
TRADD	DENND5A	strong
TRADD	TENM3	strong
TRADD	EIF3C	strong
TRADD	UBE2V2	weak
TRADD	G3BP1	weak
TRADD	PLOD1	weak
TRADD	THOC2	weak
TRADD	AKR7A2	weak
TRADD	HNRNPCL2	weak
TRADD	RCC2	weak
TRADD	S1PR2	weak
TRADD	ANTXR1	weak
TRADD	CHPF	weak
TRADD	COASY	weak
TRADD	DUS3L	weak
TRADD	KLKB1	weak
TRADD	NLGN1	weak
TRADD	NUP85	weak
TRADD	OGN	weak
TRADD	RFC3	weak
TRADD	SRP19	weak
TRADD	HAPLN3	weak
TRADD	HERC4	weak
TRADD	PDPN	weak
TRADD	RANBP2	weak
TRADD	BIRC2	weak
TRADD	DRG1	weak
TRADD	PKN2	weak
TRADD	RBP4		weak
TRADD	TNF		strong	yes
TRADD	AFM		strong
TRADD	C1QTNF3		weak
TRADD	CHST12		weak
TRADD	THAP4		weak
IKBKG	IKBKG	strong	strong	yes
IKBKG	AMOT	strong	strong
IKBKG	CHUK	strong	strong	yes
IKBKG	IKBKB	strong	strong	yes
IKBKG	CSNK1A1	strong	strong
IKBKG	NF2	strong	strong
IKBKG	TNRC6B	strong	strong
IKBKG	ALMS1	strong	strong
IKBKG	KIAA1671	strong	strong
IKBKG	TNRC6A	strong	strong
IKBKG	TBK1	strong	strong	yes
IKBKG	CSNK1D	strong	strong
IKBKG	USP54	strong	strong
IKBKG	MPP5	strong	strong
IKBKG	RNF31	strong	strong	yes
IKBKG	IDE	strong	strong
IKBKG	CCDC14	strong	weak
IKBKG	TNIP1	weak	strong	yes
IKBKG	TANK	weak	strong	yes
IKBKG	CDK4	weak	weak
IKBKG	AMOTL1	weak
IKBKG	FAM83H	weak
IKBKG	G3BP1	weak
IKBKG	PCSK5	weak
IKBKG	AKR7A2	weak
IKBKG	NTPCR	weak
IKBKG	MPHOSPH9	weak
IKBKG	NUP43	weak
IKBKG	TRIP6	weak
IKBKG	CCDC138		strong
IKBKG	ACTG1		strong
IKBKG	TNFAIP3		strong	yes
IKBKG	TNF		strong	yes
IKBKG	TNFRSF1A		strong	yes
IKBKG	CYLD		strong	yes
IKBKG	PLEKHB2		weak
IKBKG	RIPK1		weak	yes
IKBKG	TRADD		weak
IKBKG	F10		weak
IKBKG	LNX2		weak
IKBKG	RADIL		weak
IKBKG	TAB1		weak	yes
FADD	FADD	strong	strong	yes
FADD	KIF2C	strong	strong
FADD	RIPK1	strong	strong	yes
FADD	TNIP1	strong
FADD	CSNK1A1	strong	strong
FADD	CSNK1D	strong	weak
FADD	TNFAIP3	strong		yes
FADD	CCDC50	strong
FADD	NDNF	strong
FADD	CASP8	strong	weak	yes
FADD	SLC7A11	strong
FADD	ROBO2	weak
FADD	DNAAF1	weak
FADD	NUPL2	weak
FADD	RHOQ	weak
FADD	IKBKG		strong	yes
FADD	ULK3		strong
FADD	ACTG1		strong
FADD	S1PR2		strong
FADD	DLD		strong
FADD	IGHA1		strong
FADD	RNF41		strong
FADD	PREP		weak
FADD	AKR7A2		weak
FADD	ROR1		weak
FADD	SDK2		weak
FADD	EPB41L4B		weak
FADD	GOLGA7B		weak
FADD	CHUK		weak
FADD	CKMT1A		weak
FADD	PRDX4		weak
TANK	TANK	strong	strong	yes
TANK	TBK1	strong	strong	yes
TANK	AMOT	strong	strong
TANK	CNOT1	strong	strong
TANK	CHUK	strong	strong	yes
TANK	TNIP1	strong	strong
TANK	TRAF2	strong	strong	yes
TANK	ACTG1	strong	strong
TANK	IKBKG	strong	strong	yes
TANK	TRAF3	strong	strong	yes
TANK	CEP131	strong	strong
TANK	TXLNA	strong	strong
TANK	TXLNG	strong	strong
TANK	CEP135	strong
TANK	TNIP2	strong	strong
TANK	IKBKB	strong	strong
TANK	CSNK1A1	strong	strong
TANK	PICK1	strong	strong
TANK	CSNK1D	strong	strong
TANK	KIF7	strong
TANK	GSK3A	strong	strong
TANK	ULK3	strong	strong
TANK	CCDC138	strong	strong
TANK	NCAPG2	strong
TANK	IVL	strong
TANK	GSK3B	strong	strong
TANK	PFDN5	strong	strong
TANK	OBSL1	strong
TANK	BIRC2	strong	strong	yes
TANK	CKAP2	strong	weak
TANK	NCS1	strong	weak
TANK	GIGYF2	strong
TANK	MLF1	strong	strong
TANK	NF2	strong	strong
TANK	KIF2C	strong	weak
TANK	IQGAP3	strong	weak
TANK	MOXD1	strong
TANK	CEP95	strong
TANK	CNOT10	strong
TANK	KRT79	strong
TANK	PKN2	strong
TANK	ATP5B	strong
TANK	EIF4G2	strong
TANK	DNAJB4	strong
TANK	TELO2	strong
TANK	ZNF598	strong	strong
TANK	GDI1	strong
TANK	RNF115	strong
TANK	UEVLD	strong
TANK	SASS6	strong
TANK	AHNAK	strong
TANK	IGHG1	strong
TANK	IGKC	strong
TANK	RQCD1	strong
TANK	RFC3	strong	strong
TANK	FHL1	strong	weak
TANK	KRT80	strong
TANK	NOC4L	strong
TANK	PARVA	strong
TANK	SDCBP2	strong
TANK	NTPCR	strong
TANK	CCDC112	strong
TANK	CALML3	strong
TANK	CCDC77	strong
TANK	KRT15	strong
TANK	MIB1	strong
TANK	PDPK1	strong
TANK	PELI1	strong
TANK	SERPINB4	strong
TANK	SSNA1	strong
TANK	STK10	strong
TANK	TRAF5	strong
TANK	YOD1	strong
TANK	AP2A1	strong
TANK	PAFAH1B1	weak	strong
TANK	KIF5C	weak	strong
TANK	OXSR1	weak	strong
TANK	NOL6	weak	weak
TANK	HSPA2	weak	weak
TANK	OGN	weak	weak
TANK	CDC6	weak	weak
TANK	TCEB1	weak	weak
TANK	PLEKHB2	weak
TANK	RAB9A	weak
TANK	BAIAP2L1	weak
TANK	ULBP3	weak
TANK	GPSM1	weak
TANK	PFDN4	weak
TANK	UTP6	weak
TANK	HEATR1	weak
TANK	SDK2	weak
TANK	CCDC50	weak
TANK	TENM3	weak
TANK	AMOTL1	weak
TANK	TRIP6	weak
TANK	PRIM1	weak
TANK	TBC1D31	weak
TANK	TLDC1	weak
TANK	EPHB4	weak
TANK	CACNA2D2	weak
TANK	ZFAND2B	weak
TANK	ANAPC7	weak
TANK	ANXA4	weak
TANK	ATP5A1	weak
TANK	CNOT3	weak
TANK	CNTFR	weak
TANK	EPS8	weak
TANK	ERO1A	weak
TANK	FUBP3	weak
TANK	HAX1	weak
TANK	HIST2H3A	weak
TANK	IQCB1	weak
TANK	MDH2	weak
TANK	NEK2	weak
TANK	OFD1	weak
TANK	OTUD7B	weak
TANK	PLEC	weak
TANK	PPP2R5D	weak
TANK	SAPCD2	weak
TANK	SERPINB5	weak
TANK	SH3RF1	weak
TANK	SNAP47	weak
TANK	SPRR1B	weak
TANK	TRAF4	weak
TANK	UBASH3B	weak
TANK	CETN3	weak
TANK	INTS7	weak
TANK	KIF14	weak
TANK	PCSK5		strong
TANK	PREP		strong
TANK	RNF41		strong
TANK	EIF3K		weak
TANK	DYNC2H1		weak
TANK	RAB11B		strong
TANK	FAM20C		strong
TANK	NAA50		strong
TANK	TRMT6		strong
TANK	IGHA1		strong
TANK	TNFAIP3		weak
TANK	HABP2		weak
TANK	FADD		weak
TANK	MBTPS1		weak
TANK	OIT3		weak
TANK	JCHAIN		weak
TANK	NPEPPSL1		weak
TANK	PRSS3		weak
TANK	RFC4		weak
TANK	ADSS		weak
TANK	CPS1		weak
TANK	CAMK2B		weak
TANK	HSPA13		weak
TANK	MRC2		weak
TANK	PPT1		weak
TANK	SCPEP1		weak
TRAF2	TRAF2	strong	strong	yes
TRAF2	BIRC2	strong	strong	yes
TRAF2	ACTG1	strong		yes
TRAF2	TBK1	strong	strong	yes
TRAF2	USP54	strong	strong
TRAF2	MLF1	strong	strong
TRAF2	MYH11	strong	strong
TRAF2	TRAF3	strong		yes
TRAF2	ULK3	strong	strong
TRAF2	MOXD1	strong	strong
TRAF2	TROAP	strong	strong	yes
TRAF2	TRADD	strong	strong	yes
TRAF2	DHFR	strong	strong
TRAF2	TANK	strong	strong	yes
TRAF2	CD82	strong	strong
TRAF2	DYRK1A	strong	strong
TRAF2	STAU2	strong	strong
TRAF2	FREM2	strong
TRAF2	PSMB3	weak	strong
TRAF2	EIF4G2	weak	strong
TRAF2	USP25	weak	strong
TRAF2	TNIP2	weak	strong
TRAF2	NCS1	weak	strong
TRAF2	FAM188A	weak	weak
TRAF2	UMAD1	weak
TRAF2	C1orf122	weak
TRAF2	VPS37D	weak
TRAF2	PLEC	weak
TRAF2	CPVL	weak
TRAF2	IGHG1		strong
TRAF2	UEVLD		strong
TRAF2	PLEKHB2		strong
TRAF2	FZD7		strong
TRAF2	TMEM178B		strong
TRAF2	RAB9A		weak
TRAF2	DENND5A		weak
TRAF2	SLC7A11		weak
TRAF2	TENM3		weak
TRAF2	CSNK1A1		weak
TRAF2	ZFAND6		weak	yes
TRAF2	TNFAIP3		strong	yes
TRAF2	TNF		strong	yes
TRAF2	KRT80		strong
TRAF2	TNIP1		strong
TRAF2	TNFRSF1A		strong	yes
TRAF2	EPHA5		strong
TRAF2	RIPK1		strong	yes
TRAF2	CEP85		strong
TRAF2	PTBP2		weak
TRAF2	ARG1		weak
TRAF2	MAVS		weak	yes
RBCK1	RBCK1	strong	strong	yes
RBCK1	RNF31	strong	strong	yes
RBCK1	UEVLD	strong	strong
RBCK1	TNIP2	strong	strong
RBCK1	ULK3	strong	strong
RBCK1	YOD1	strong	strong
RBCK1	MOXD1	strong	strong
RBCK1	RNF115	strong	strong
RBCK1	ULBP3	strong	strong
RBCK1	CD82	strong	strong
RBCK1	KHNYN	strong	strong
RBCK1	SHARPIN	strong	strong	yes
RBCK1	DHFR	strong
RBCK1	TENM3	strong
RBCK1	UMAD1	strong
RBCK1	UBE2V2	strong	strong
RBCK1	NCS1	strong	weak
RBCK1	AMOT	strong
RBCK1	CAPN15	strong
RBCK1	MSTO1	strong
RBCK1	AP2A2	weak	weak
RBCK1	FAM188A	weak
RBCK1	PDPN	weak
RBCK1	MFI2	weak
RBCK1	VPS37D	weak
RBCK1	ZFAND2B		strong
RBCK1	RAB9A		weak
RBCK1	TNIP1		weak
RBCK1	ATP6AP2		weak
RNF31	RNF31	strong	strong	yes
RNF31	RTN3	weak	strong
RNF31	HNRNPCL2	weak
RNF31	REEP5	weak
RNF31	GDI1	weak
RNF31	GOLGA3	weak
RNF31	DNAH8	weak
RNF31	HM13	weak
RNF31	CD82		strong
RNF31	TNIP1		strong
RNF31	TNF		strong	yes
RNF31	TNFAIP3		strong	yes
RNF31	SPR		strong
SHARPIN	SHARPIN	strong	strong	yes
SHARPIN	TRAF3	strong	strong
SHARPIN	RNF31	strong	strong	yes
SHARPIN	TAB1	strong	strong
SHARPIN	MAP3K7	strong	strong
SHARPIN	TAB2	strong	weak
SHARPIN	DHFR	strong	weak
SHARPIN	MOXD1	strong	strong
SHARPIN	NCS1	strong	strong
SHARPIN	TENM3	strong	strong
SHARPIN	ULK3	strong	weak
SHARPIN	SEMA4G	strong
SHARPIN	GDI1	strong
SHARPIN	TNIP2	strong
SHARPIN	TNIP1	weak	strong
SHARPIN	RBCK1	weak	strong	yes
SHARPIN	ULBP3	weak	weak
SHARPIN	HPRT1	weak
SHARPIN	TLDC1	weak
SHARPIN	VPS37D	weak
SHARPIN	LDOC1L	weak
SHARPIN	IKBKG	weak		yes
SHARPIN	PDPN	weak
SHARPIN	MKRN2	weak
SHARPIN	MKRN4P	weak
SHARPIN	PHB2		strong
SHARPIN	RAB9A		strong
SHARPIN	FZD7		weak
SHARPIN	UMAD1		weak
SHARPIN	TNFAIP3		strong	yes
SHARPIN	TNF		strong	yes
SHARPIN	ORAI1		weak
SHARPIN	S1PR2		weak
SHARPIN	UEVLD		weak
SHARPIN	DNAJB4		weak
SHARPIN	ZCCHC3		weak
TNIP1	TNIP1	strong	strong	yes
TNIP1	TAX1BP1	strong	strong	yes
TNIP1	TNIP2	strong	strong
TNIP1	UEVLD	strong
TNIP1	TBK1	strong		yes
TNIP1	ULK3	strong	strong
TNIP1	MLF1	strong	strong
TNIP1	CD82	strong
TNIP1	NBR1	strong	weak
TNIP1	TENM3	strong
TNIP1	SEMA4G	strong
TNIP1	OPTN	weak	strong	yes
TNIP1	PLEKHB2	weak	weak
TNIP1	PJA2	weak
TNIP1	MYH11	weak
TNIP1	ROR1	weak
TNIP1	RNF115	weak
TNIP1	UMAD1	weak
TNIP1	CACNA2D2	weak
TNIP1	MOXD1		weak
TNIP1	PODXL2		weak
TNIP1	EMILIN2		strong
TNIP1	TNFAIP3		strong	yes
TNIP1	EIF3C		strong
TNIP1	TNF		strong	yes
TNIP1	NID2		strong
TNIP1	NDNF		strong
TNIP1	COCH		strong
TNIP1	HIST3H2BB		strong
TNIP1	SET		strong
TNIP1	SMOC1		strong
TNIP1	TNFRSF1A		weak
TNIP1	TRADD		weak
TNIP1	HAPLN3		weak
TNIP1	LAMA4		weak
TNIP1	SPOCK3		weak
TNIP1	SULF2		weak
TNIP2	TNIP2	strong	strong
TNIP2	AMOT	strong	strong
TNIP2	YLPM1	strong	strong
TNIP2	AMOTL1	strong	strong
TNIP2	NF2	strong	strong
TNIP2	TNRC6B	strong	strong
TNIP2	USP54	strong	strong
TNIP2	TRIM25	strong	strong
TNIP2	PRRC2A	strong	strong
TNIP2	MOXD1	strong	strong
TNIP2	IKBKG	strong	strong	yes
TNIP2	CHUK	strong	strong	yes
TNIP2	BAG4	strong	strong
TNIP2	TBK1	strong	strong
TNIP2	UEVLD	strong	strong
TNIP2	NCKAP5L	strong	strong
TNIP2	CEP164	strong
TNIP2	TRO	strong
TNIP2	KIAA1671	strong
TNIP2	ULK3	weak	strong
TNIP2	DTNA	weak	strong
TNIP2	YTHDF1	weak	strong
TNIP2	CD82	weak	weak
TNIP2	TENM3	weak	weak
TNIP2	MLF1	weak
TNIP2	RBM4	weak
TNIP2	ZNF598	weak
TNIP2	GOLPH3	weak
TNIP2	CAPN1	weak
TNIP2	TNFAIP3		strong	yes
TNIP2	SASS6		strong
TNIP2	SDCCAG3		strong
TNIP2	MPP5		weak
TNIP2	TLDC1		weak
TNIP2	TELO2		weak
TNIP2	MKRN2		weak
TNIP2	SPATA2L		weak
TNIP2	EMILIN2		strong
TNIP2	NDNF		strong
TNIP2	NID2		strong
TNIP2	TNFRSF1A		strong
TNIP2	SHARPIN		strong
TNIP2	TNIP1		strong
TNIP2	TNF		strong
TNIP2	DHFR		strong
TNIP2	TNRC6A		strong
TNIP2	FUBP3		strong
TNIP2	VPS37A		strong
TNIP2	ZCCHC3		strong
TNIP2	LAMA4		strong
TNIP2	EIF3K		strong
TNIP2	IKBKB		strong	yes
TNIP2	YTHDF3		strong
TNIP2	SMOC1		strong
TNIP2	RIPK1		weak
TNIP2	CSNK1D		weak
TNIP2	NCS1		weak
TNIP2	OTUD7B		weak
TNIP2	TMEM178B		weak
TNIP2	PTBP2		weak
TNIP2	PTX3		weak
TNIP2	C14orf80		weak
TNIP2	SKA1		weak
BIRC2	BIRC2	strong	strong	yes
BIRC2	TRAF2	strong	strong	yes
BIRC2	TNIP1	strong	strong
BIRC2	TRAF3	strong	strong	yes
BIRC2	RIPK1	strong	strong	yes
BIRC2	ULK3	strong	strong
BIRC2	HBE1	strong	strong
BIRC2	PLEKHB2	strong	weak
BIRC2	TNIP2	weak	strong
BIRC2	IKBKG	weak	strong	yes
BIRC2	OPTN	weak	strong
BIRC2	UEVLD	weak	strong
BIRC2	RNF115	weak	weak
BIRC2	HAPLN3	weak	weak
BIRC2	UMAD1	weak	weak
BIRC2	RNF31	weak	weak	yes
BIRC2	LGR4	weak	weak
BIRC2	TRAF1	weak	weak	yes
BIRC2	C3orf58	weak
BIRC2	PLOD1	weak
BIRC2	AKR7A2		strong
BIRC2	MYCBPAP		strong
BIRC2	TAX1BP1		weak
BIRC2	CD82		weak
BIRC2	EFNA5		weak
BIRC2	TNFAIP3		strong	yes
BIRC2	TNF		strong	yes
BIRC2	UBE2V2		strong
BIRC2	TNFRSF1A		strong	yes
BIRC2	YOD1		weak
